# Supplementary material
Source: HighWire-hosted journal article supplement (http://jpet.aspetjournals.org/highwire/filestream/136429/field_highwire_adjunct_files/0/206623_SupplementaryFigure2_revised.pdf)
Supplement: 206623_SupplementaryFigure2_revised.pdf [file 206623_SupplementaryFigure2_revised.pdf]

Title: *N*-aryl piperazine metabotropic glutamate receptor 5 positive allosteric modulators possess efficacy in pre-clinical models of NMDA hypofunction and cognitive enhancement

Authors: K.J. Gregory\*, E.J. Herman\*, A.J. Ramsey, A.S. Hammond, N.E. Byun, S.R. Stauffer, J.T. Manka, S. Jadhav, T.M. Bridges, C.D. Weaver, C.M. Niswender, T. Steckler, W.H. Drinkenburg, A. Ahnaou, H. Lavreysen, G.J. Macdonald, J.M. Bartolomé, C. Mackie, B.J. Hrupka, M.G. Caron, T. Daigle, C.W. Lindsley, P.J. Conn, C.K. Jones

Journal: J. Pharmacol. Exp. Ther.

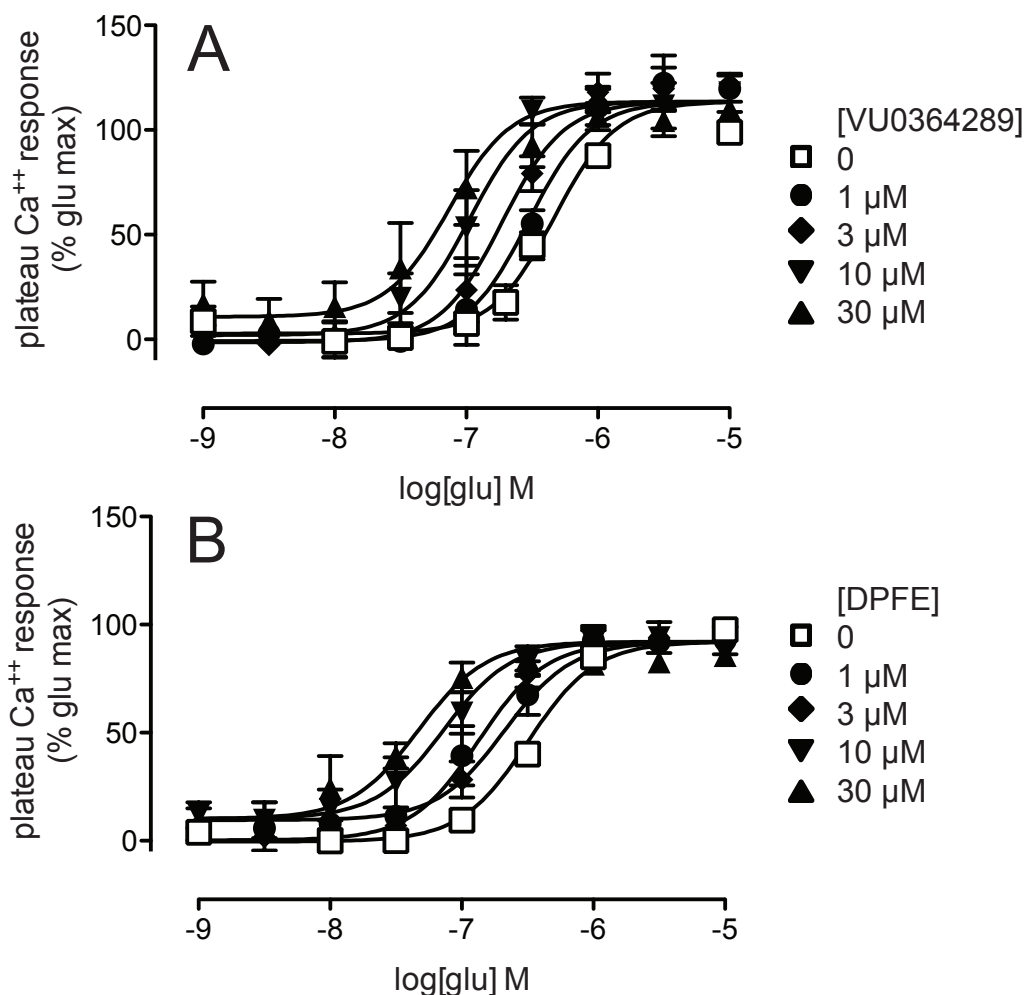

**Supplementary Figure 2 Potentiation of glu mediated plateau response for mobilization of intracellular  $\text{Ca}^{++}$  stores by *N*-aryl piperazine PAMs**

Changes in intracellular  $\text{Ca}^{++}$  mobilization following exposure to modulators in the absence and presence of glu were investigated in HEK293A cells stably expressing rat mGlu<sub>5</sub> using a Fluo-4 fluorescence-based  $\text{Ca}^{++}$  assay. A) Leftward shifts in the glu concentration-response curve 2 min post addition caused by addition of indicated concentrations of VU0364289 or DPFE.

Data represent the mean  $\pm$  s.e.m. of 4-6 independent experiments performed in duplicate. Error bars not shown lie within the dimensions of the symbol.
